# Supplementary material
Source: HighWire-hosted journal article supplement (doi:10.1101/rna.056937.116)
Supplement: Supplemental_Figures_Tables_Legends.docx [file Supplemental_Figures_Tables_Legends.docx]

# Supplementary Figure. 1. A. Detection of Gld2 and Gld4 mRNAs by RT-PCR in different brain parts from WT and Gld2 KO animals. GAPDH was used as a loading control. 1, cortex; 2, hippocampus; 3, cerebellum. B. Sequence length (base pairs) distribution of cDNA libraries after data preprocessing (see Methods). C. Quality assessment of miRNA libraries. Table of total read counts of 6 WT and 6 Gld KO hippocampal miRNA libraries. D. Scatter plot (log scale) of the steady state levels of hippocampal miRNAs from WT and Gld2 KO mice. E. MA plot generated by DESeq2 using the miRNA read counts from Kraken. The Y-axis shows the log (base 2) of the fold change between the mean normalized WT counts and the mean normalized KO counts for each miRNA. The X-axis shows the mean normalized counts averaged over all samples from WT versus Gld2 KO hippocampus.

# Supplementary Figure. 2. RT-qPCR validation of miRNA differential expression in WT and Gld2 KO hippocampus. The profiles of 14 miRNAs using RT-qPCR shows similar levels in the two genotypes, thus confirming the sequencing data. The fold difference in Gld2 KO samples in 3 independent RNA samples with 2 technical replicas relative to WT were calculated using 2ˆ(–delta delta CT) method. SnoRD6 was used as a reference RNA.

Supplementary Figure.3. Alignment of monoadenylated miRNAs. A. Nucleotide composition of the 3’ most templated four nucleotides of monoadenylated (upper panel) or unmodified (lower panel) miRNAs. The nucleotide composition of 43 monoadenylated miRNAs (p < 0.05) were compared to 1110 unmodified miRNAs and plotted as percentage of each nucleotide in each 3’ end position. B. Sequence alignment of 42 monoadenylated miRNAs using CLUSTAL W (1.83) relative to the reference let-7i-5p miRNA.

Supplementary Table 1. List of mono-adenylated miRNAs in WT and Gld2 KO hippocampus.

Supplementary Table 2. List of uridylated miRNAs in WT and Gld2 KO hippocampus.

Supplementary Table 3. List of total unique miRNA reads in WT and Gld2 KO hippocampus
