# Supplementary material
Source: HighWire-hosted journal article supplement (doi:10.1101/rna.056937.116)
Supplement: Supplemental_Table1.xlsx [file Supplemental_Table1.xlsx]

## Sheet: merged_additional_A_prop.txt
miRNA	WT6_all	WT6	WT6_prop	WT5_all	WT5	WT5_prop	WT4_all	WT4	WT4_prop	WT3_all	WT3	WT3_prop	WT2_all	WT2	WT2_prop	WT1_all	WT1	WT1_prop	avg_WT_all	avg_WT	avg_WT%	KO6_all	KO6	KO6_prop	KO5_all	KO5	KO5_prop	KO4_all	KO4	KO4_prop	KO3_all	KO3	KO3_prop	KO2_all	KO2	KO2_prop	KO1_all	KO1	KO1_prop	avg_KO_all	avg_KO	avg_KO%	pval	log FC
let-7a-5p	24504	1791	0.0730901	89705	6711	0.0748119	79908	5237	0.0655379	68062	4137	0.0607828	75563	5374	0.0711195	94179	6059	0.0643349	71986.8	4884.83	0.0682795	53040	2116	0.0398944	43890	1840	0.041923	88671	3340	0.0376673	38769	1251	0.032268	42806	1612	0.0376583	42283	1956	0.0462597	51576.5	2019.17	0.0392785	0.030639	1.27455
let-7b-5p	124310	8024	0.0645483	151586	9459	0.0624002	142026	8786	0.0618619	138686	9505	0.0685361	140313	8943	0.0637361	199783	9994	0.0500243	149451	9118.5	0.0618512	116159	1709	0.0147126	98339	1504	0.015294	141518	2639	0.0186478	89477	1261	0.014093	87454	1386	0.0158483	76332	1188	0.0155636	101546	1614.5	0.0156932	0.00507487	2.49771
mmu-let-7c-2-3p	2388	29	0.0121441	1457	25	0.0171585	2581	31	0.0120108	410	0	0	1746	11	0.00630011	1248	11	0.0088141	1638.33	17.8333	0.00940461	917	0	0	1352	16	0.0118343	2116	31	0.0146503	1688	19	0.0112559	1369	11	0.00803506	971	13	0.0133883	1402.17	15	0.00986064	0.935508	0.249614
let-7c-5p	440813	22913	0.051979	505877	25150	0.0497156	476443	24751	0.0519496	386516	21086	0.054554	450505	22993	0.0510383	604424	28678	0.0474468	477430	24261.8	0.0511139	354621	9369	0.0264198	337509	9684	0.0286926	464050	13786	0.029708	282400	6929	0.0245361	276296	7419	0.0268516	253957	6860	0.0270124	328139	9007.83	0.0272034	0.00507487	1.42944
mmu-let-7d-5p	26362	1361	0.0516273	78270	4436	0.0566756	69864	3776	0.0540479	56034	2980	0.053182	39380	1869	0.0474606	80819	3423	0.0423539	58454.8	2974.17	0.0508912	46071	1112	0.0241367	59662	1441	0.0241527	56093	1259	0.0224449	45143	969	0.0214651	40628	937	0.0230629	182790	5306	0.0290278	71731.2	1837.33	0.0240484	0.0926958	0.694872
let-7e-5p	23777	1160	0.0487866	20154	1006	0.0499156	18856	884	0.0468816	12166	558	0.0458655	17823	881	0.0494305	27562	1096	0.0397649	20056.3	930.833	0.0467741	12292	300	0.0244061	12802	317	0.0247618	19567	429	0.0219247	11427	199	0.0174149	15388	308	0.0200156	10459	293	0.0280142	13655.8	307.667	0.0227562	0.00507487	1.59715
let-7f-5p	52733	3078	0.0583695	142295	8557	0.0601356	134876	7619	0.0564889	121481	6521	0.0536792	125571	7765	0.0618375	89950	4285	0.0476376	111151	6304.17	0.0563581	93129	3573	0.0383661	45018	1395	0.0309876	117267	4582	0.0390732	53951	1747	0.0323812	72516	2849	0.0392879	71207	2826	0.0396871	75514.7	2828.67	0.0366305	0.0202406	1.15618
let-7g-5p	13452	734	0.0545644	52347	3840	0.0733566	45066	1492	0.033107	36998	1418	0.0383264	48205	2588	0.0536874	41310	1344	0.0325345	39563	1902.67	0.047596	37134	1409	0.0379437	29391	1331	0.045286	54848	443	0.00807687	27431	1053	0.0383872	32419	1205	0.0371696	21605	597	0.0276325	33804.7	1006.33	0.032416	0.0453276	0.918915
let-7i-5p	11587	1910	0.16484	57438	11673	0.203228	47341	6661	0.140703	39130	5277	0.134858	47188	8491	0.17994	51217	5557	0.108499	42316.8	6594.83	0.155345	32474	2599	0.0800333	32552	3255	0.0999939	38518	1239	0.0321668	31315	3074	0.0981638	31416	2721	0.0866119	28911	2137	0.0739165	32531	2504.17	0.078481	0.0453276	1.39701
mmu-mir-100-5p	2779	357	0.128463	3408	240	0.0704225	2818	291	0.103265	2817	276	0.0979766	3142	295	0.0938892	2671	227	0.0849869	2939.17	281	0.0965006	1809	84	0.0464345	2341	199	0.0850064	7073	483	0.0682879	3360	211	0.0627976	2647	204	0.0770684	2922	250	0.0855578	3358.67	238.5	0.0708588	0.128205	0.236581
mmu-mir-101a-3p	50171	2695	0.0537163	45249	2764	0.0610842	22461	1159	0.0516006	65153	1824	0.0279956	38678	3512	0.090801	10016	128	0.0127796	38621.3	2013.67	0.0496629	18340	1296	0.0706652	29311	1668	0.056907	6223	89	0.0143018	36816	1547	0.0420198	30994	1363	0.0439763	13327	216	0.0162077	22501.8	1029.83	0.0406796	0.173485	0.967414
mir-1249-3p	6222	204	0.0327869	2891	92	0.0318229	4483	212	0.0472898	1041	50	0.0480307	4421	153	0.0346076	1284	48	0.0373832	3390.33	126.5	0.0386535	2493	32	0.0128359	1659	42	0.0253165	1209	21	0.0173697	5010	90	0.0179641	3030	68	0.0224422	1341	23	0.0171514	2457	46	0.0188466	0.030639	1.45943
mmu-mir-125a-5p	30244	151	0.00499273	27919	63	0.00225653	24345	146	0.00599712	9858	65	0.00659363	14883	84	0.00564402	13816	84	0.00607991	20177.5	98.8333	0.00526066	14710	33	0.00224337	22801	130	0.0057015	6626	33	0.00498038	17364	61	0.00351302	29656	66	0.00222552	12012	67	0.00557776	17194.8	65	0.00404026	0.126869	0.604558
mmu-mir-125b-5p	219734	7574	0.0344689	94892	3462	0.0364836	185620	6011	0.0323834	79284	2083	0.0262726	75886	2808	0.0370029	116957	3225	0.0275742	128729	4193.83	0.0323643	80170	2450	0.0305601	121590	4917	0.0404392	68602	1561	0.0227544	112543	3567	0.0316946	180808	5977	0.0330572	74162	3799	0.0512257	106312	3711.83	0.0349552	0.936186	0.176138
mir-126a-3p	14236	1053	0.0739674	9069	781	0.0861175	16699	904	0.054135	5392	1227	0.227559	13021	1142	0.0877045	19153	1627	0.0849475	12928.3	1122.33	0.102405	5466	164	0.0300037	13013	820	0.0630139	7514	810	0.107799	17255	1017	0.0589394	15148	832	0.0549247	15470	804	0.0519716	12311	741.167	0.0611087	0.0655522	0.598631
mmu-mir-126a-5p	6863	318	0.0463354	8220	422	0.0513382	15369	896	0.0582992	13615	1343	0.0986412	9810	435	0.0443425	13150	1276	0.0970342	11171.2	781.667	0.0659985	6544	305	0.0466076	16084	646	0.0401641	22260	913	0.0410153	14503	770	0.0530925	13874	704	0.0507424	25365	2143	0.0844865	16438.3	913.5	0.0526847	0.936186	-0.224851
mir-127-3p	7178	93	0.0129563	24606	339	0.0137771	48647	549	0.0112854	12903	171	0.0132527	10091	134	0.0132792	16956	113	0.00666431	20063.5	233.167	0.0118692	17687	25	0.00141347	41832	98	0.0023427	6050	14	0.00231405	48926	94	0.00192127	36530	93	0.00254585	42039	91	0.00216466	32177.3	69.1667	0.002117	0.0161224	1.75321
mir-128-3p	62545	1516	0.0242385	67609	2806	0.0415034	91286	3318	0.0363473	50222	2426	0.0483055	21587	522	0.0241812	43920	729	0.0165984	56194.8	1886.17	0.0318624	37857	177	0.00467549	36863	189	0.00512709	4731	13	0.00274783	47163	126	0.00267159	62762	239	0.00380804	77712	367	0.00472257	44514.7	185.167	0.00395877	0.00507487	3.34856
mmu-mir-129-2-3p	20984	29	0.00138201	34034	48	0.00141035	7613	16	0.00210167	29966	17	0.00056731	13824	50	0.0036169	5444	10	0.00183688	18644.2	28.3333	0.00181919	9687	20	0.00206462	12266	21	0.00171205	4764	0	0	18161	17	0.000936072	12374	11	0.000888961	6763	0	0	10669.2	11.5	0.000933617	0.198608	1.30087
mir-129-5p	1060	20	0.0188679	926	11	0.011879	2258	46	0.020372	1094	21	0.0191956	846	19	0.0224586	1524	19	0.0124672	1284.67	22.6667	0.0175401	927	0	0	1394	0	0	3114	19	0.00610148	1822	0	0	1817	16	0.00880572	1806	0	0	1813.33	5.83333	0.00248453	0.0172722	1.95818
mmu-mir-1298-5p	132	11	0.0833333	200	26	0.13	100	12	0.12	136	17	0.125	164	32	0.195122	151	0	0	147.167	16.3333	0.108909	4380	446	0.101826	210	22	0.104762	186	12	0.0645161	79	0	0	94	0	0	67	10	0.149254	836	81.6667	0.0700597	0.627932	-2.32193
mmu-mir-132-3p	3488	467	0.133888	6767	661	0.0976799	2723	188	0.0690415	2313	18	0.0077821	3744	332	0.0886752	4192	87	0.0207538	3871.17	292.167	0.0696367	2490	60	0.0240964	2160	26	0.012037	3238	27	0.00833848	7774	87	0.0111911	3117	77	0.0247032	5554	20	0.00360101	4055.5	49.5	0.0139946	0.0776483	2.56129
mmu-mir-132-5p	4016	13	0.00323705	2261	0	0	4139	0	0	3535	11	0.00311174	3495	12	0.00343348	4662	12	0.002574	3684.67	8	0.00205938	740	0	0	3783	0	0	3606	0	0	5093	10	0.00196348	4100	15	0.00365854	8759	25	0.00285421	4346.83	8.33333	0.0014127	0.933712	-0.0588937
mmu-mir-135a-5p	4922	39	0.00792361	3989	44	0.0110303	1864	17	0.00912017	2429	19	0.00782215	3093	38	0.0122858	1125	0	0	2903.67	26.1667	0.00803034	1058	15	0.0141777	3065	28	0.0091354	1159	15	0.0129422	2231	20	0.00896459	2606	22	0.00844206	6369	53	0.00832156	2748	25.5	0.0103306	0.936075	0.0372329
mir-137-3p	4749	53	0.0111602	7681	74	0.00963416	5792	50	0.0086326	2832	41	0.0144774	4346	52	0.011965	5405	65	0.0120259	5134.17	55.8333	0.0113159	2279	25	0.0109697	2888	20	0.00692521	3282	24	0.00731261	3774	18	0.00476948	1989	0	0	3255	54	0.0165899	2911.17	23.5	0.00776115	0.030639	1.24847
mir-138-1-3p	1393	57	0.0409189	857	40	0.0466744	866	44	0.0508083	518	29	0.0559846	750	29	0.0386667	478	21	0.0439331	810.333	36.6667	0.0461643	668	16	0.0239521	842	22	0.0261283	474	0	0	326	14	0.0429448	489	20	0.0408998	283	14	0.04947	513.667	14.3333	0.0305658	0.00801585	1.35509
mir-138-2-3p	953	23	0.0241343	736	34	0.0461957	723	25	0.0345781	715	21	0.0293706	713	27	0.0378682	824	21	0.0254854	777.333	25.1667	0.0329387	358	15	0.0418994	654	15	0.0229358	361	15	0.0415512	115	0	0	391	10	0.0255754	754	25	0.0331565	438.833	13.3333	0.0275197	0.0234706	0.916477
mir-139-5p	7435	62	0.00833894	4292	114	0.026561	12731	226	0.0177519	16715	141	0.00843554	4833	64	0.0132423	3300	42	0.0127273	8217.67	108.167	0.0145095	4252	0	0	4123	0	0	15332	19	0.00123924	7586	13	0.00171368	6972	27	0.00387263	6542	15	0.00229288	7467.83	12.3333	0.00151974	0.00499812	3.13262
mmu-mir-140-5p	714	42	0.0588235	420	26	0.0619048	508	44	0.0866142	37	0	0	538	46	0.0855019	140	14	0.1	392.833	28.6667	0.0654741	308	0	0	287	21	0.0731707	67	0	0	689	51	0.0740203	356	25	0.0702247	108	12	0.111111	302.5	18.1667	0.0547545	0.375117	0.65808
mir-142a-3p	791	21	0.0265487	1321	29	0.0219531	539	11	0.0204082	194	0	0	989	25	0.0252781	372	11	0.0295699	701	16.1667	0.0206263	373	0	0	308	0	0	169	0	0	1891	15	0.00793231	705	0	0	104	0	0	591.667	2.5	0.00132205	0.0398561	2.69302
mmu-mir-150-5p	5044	836	0.165741	4810	184	0.0382536	3468	737	0.212514	2206	501	0.227108	3085	348	0.112804	1858	324	0.174381	3411.83	488.333	0.155134	2286	195	0.0853018	2767	277	0.100108	1890	194	0.102646	3406	398	0.116853	3266	506	0.15493	2007	336	0.167414	2603.67	317.667	0.121209	0.378478	0.620353
mir-154-5p	2933	65	0.0221616	4362	94	0.0215497	3694	94	0.0254467	718	0	0	3691	76	0.0205906	4087	32	0.0078297	3247.5	60.1667	0.0162631	7639	0	0	3340	0	0	1078	0	0	4109	16	0.00389389	2825	0	0	5173	19	0.00367292	4027.33	5.83333	0.00126113	0.02472	3.36657
mir-15a-5p	5828	514	0.0881949	3517	425	0.120842	3720	337	0.0905914	5234	459	0.0876958	3541	328	0.0926292	1250	91	0.0728	3848.33	359	0.0921255	1945	85	0.0437018	1428	110	0.0770308	3587	76	0.0211876	4724	315	0.0666808	3607	271	0.0751317	909	43	0.0473047	2700	150	0.0551729	0.0202406	1.25902
mir-16-5p	13912	1323	0.0950978	8683	1262	0.145341	6608	1023	0.154812	14815	1077	0.0726966	7084	850	0.119989	3353	331	0.0987176	9075.83	977.667	0.114442	7486	210	0.0280524	6047	256	0.042335	10420	385	0.0369482	9120	523	0.0573465	8384	499	0.0595181	2515	257	0.102187	7328.67	355	0.0543978	0.0202406	1.46152
mmu-mir-181a-5p	54228	137	0.00252637	41424	100	0.00241406	41261	83	0.00201158	25363	53	0.00208966	37625	90	0.00239203	51194	152	0.0029691	41849.2	102.5	0.00240047	20814	37	0.00177765	29926	47	0.00157054	48162	156	0.00323907	42876	43	0.00100289	32622	66	0.00202317	72873	258	0.00354041	41212.2	101.167	0.00219229	0.47117	0.0188899
mmu-mir-181b-5p	19019	138	0.0072559	13901	97	0.00697792	9662	43	0.00445042	13257	87	0.00656257	12703	86	0.00677005	18172	116	0.00638345	14452.3	94.5	0.00640005	8470	30	0.00354191	9276	36	0.00388098	24194	125	0.00516657	8206	18	0.00219352	11436	53	0.00463449	23705	103	0.00434507	14214.5	60.8333	0.00396042	0.229766	0.635452
mmu-mir-181c-5p	6874	30	0.00436427	6618	18	0.00271985	7726	21	0.00271809	5679	10	0.00176087	4931	25	0.00506997	7010	32	0.00456491	6473	22.6667	0.00353299	2877	0	0	3824	0	0	4386	29	0.00661195	4869	11	0.00225919	4246	10	0.00235516	9318	41	0.00440009	4920	15.1667	0.0026044	0.334973	0.579668
mmu-mir-181d-5p	9053	83	0.00916823	7366	53	0.00719522	5543	41	0.00739672	4882	54	0.011061	9009	103	0.011433	7174	57	0.00794536	7171.17	65.1667	0.00903326	4988	31	0.00621492	2328	11	0.00472509	11395	111	0.00974111	6370	34	0.00533752	5859	34	0.00580304	2408	18	0.00747508	5558	39.8333	0.00654946	0.065081	0.710158
mir-1839-5p	838	47	0.0560859	1710	152	0.0888889	1422	116	0.0815752	653	138	0.211332	1300	120	0.0923077	1383	125	0.0903832	1217.67	116.333	0.103429	813	12	0.0147601	1823	14	0.00767965	1230	34	0.0276423	1434	14	0.0097629	1157	21	0.0181504	3251	62	0.0190711	1618	26.1667	0.0161777	0.00812704	2.15246
mir-185-5p	4506	308	0.0683533	5627	294	0.0522481	4682	105	0.0224263	1749	51	0.0291595	1072	73	0.068097	1813	93	0.0512962	3241.5	154	0.0485967	3346	25	0.00747161	842	0	0	5071	30	0.00591599	6025	56	0.00929461	5643	39	0.00691122	506	0	0	3572.17	25	0.00493224	0.00812704	2.62293
mir-190a-5p	1907	56	0.0293655	2352	66	0.0280612	2347	50	0.0213038	516	22	0.0426357	1870	49	0.0262032	2749	84	0.0305566	1956.83	54.5	0.0296877	1088	30	0.0275735	1389	45	0.0323974	88	0	0	1793	36	0.0200781	1454	23	0.0158184	521	18	0.0345489	1055.5	25.3333	0.0217361	0.030639	1.10522
mmu-mir-199b-3p	392	27	0.0688776	264	18	0.0681818	230	21	0.0913043	258	20	0.0775194	303	13	0.0429043	527	47	0.0891841	329	24.3333	0.0729952	233	10	0.0429185	469	14	0.0298507	31	0	0	570	26	0.045614	386	16	0.0414508	615	34	0.0552846	384	16.6667	0.0358531	0.297953	0.545968
mir-218-5p	40850	205	0.00501836	13810	50	0.00362056	49770	180	0.00361664	22964	132	0.00574813	32555	134	0.00411611	37843	186	0.00491504	32965.3	147.833	0.00450581	18985	25	0.00131683	20044	29	0.00144682	25959	68	0.00261952	16280	15	0.000921376	34768	42	0.00120801	42836	71	0.00165748	26478.7	41.6667	0.00152834	0.0130652	1.82701
mir-219a-2-3p	2979	28	0.00939913	4018	61	0.0151817	1281	25	0.019516	416	16	0.0384615	3138	29	0.00924156	1435	14	0.0097561	2211.17	28.8333	0.016926	3469	10	0.00288268	2850	0	0	2927	11	0.00375811	5779	0	0	3408	10	0.00293427	4632	15	0.00323834	3844.17	7.66667	0.00213557	0.00801585	1.91107
mmu-mir-21a-5p	17200	147	0.00854651	16532	116	0.00701669	17796	105	0.0059002	8042	51	0.00634171	11213	85	0.00758049	14295	144	0.0100735	14179.7	108	0.00757651	6186	24	0.00387973	10294	54	0.00524577	17050	136	0.00797654	11082	60	0.00541419	8911	66	0.00740658	22303	240	0.0107609	12637.7	96.6667	0.00678061	0.47117	0.159941
mmu-mir-22-3p	1585	62	0.0391167	3435	133	0.0387191	1013	31	0.0306022	446	21	0.0470852	1262	30	0.0237718	1313	12	0.00913938	1509	48.1667	0.0314057	796	15	0.0188442	2197	18	0.00819299	589	0	0	6313	22	0.00348487	838	0	0	12970	162	0.0124904	3950.5	36.1667	0.00716874	0.228951	0.413374
mir-22-5p	3292	197	0.059842	1607	106	0.0659614	945	49	0.0518519	2575	144	0.0559223	2241	106	0.0473003	2861	123	0.042992	2253.5	120.833	0.0539783	1595	30	0.0188088	545	10	0.0183486	482	0	0	2035	33	0.0162162	1261	41	0.0325139	406	0	0	1054	19	0.0143146	0.00492204	2.66895
mmu-mir-222-3p	76769	235	0.00306113	39726	207	0.00521069	7220	117	0.016205	1591	22	0.0138278	6368	63	0.00989322	9353	98	0.0104779	23504.5	123.667	0.00977929	24036	209	0.00869529	4986	45	0.00902527	9824	47	0.0047842	66077	302	0.00457043	20285	201	0.0099088	13483	160	0.0118668	23115.2	160.667	0.0081418	0.688921	-0.377614
mir-24-3p	22489	817	0.0363289	13365	905	0.0677142	9743	1017	0.104383	20645	737	0.0356987	16989	743	0.0437342	27934	416	0.0148922	18527.5	772.5	0.0504585	12914	85	0.006582	12088	107	0.00885175	45296	375	0.00827888	39456	155	0.00392843	29978	185	0.00617119	2802	59	0.0210564	23755.7	161	0.00914477	0.00507487	2.26247
mir-26a-5p	46435	1081	0.0232799	53718	1307	0.0243308	63715	1551	0.0243428	39708	922	0.0232195	29466	648	0.0219914	33689	764	0.022678	44455.2	1045.5	0.0233071	23448	170	0.00725009	40227	205	0.00509608	41942	281	0.00669973	28698	167	0.00581922	40250	252	0.00626087	24931	175	0.00701937	33249.3	208.333	0.00635756	0.00507487	2.32723
mir-26b-5p	5172	59	0.0114076	5645	101	0.0178919	5507	80	0.014527	4425	61	0.0137853	4119	67	0.0162661	4583	62	0.0135283	4908.5	71.6667	0.0145677	2210	40	0.0180995	4165	33	0.00792317	3991	83	0.0207968	2587	31	0.011983	3583	36	0.0100474	2135	33	0.0154567	3111.83	42.6667	0.0140511	0.0449512	0.748193
mmu-mir-28a-3p	144	28	0.194444	198	54	0.272727	102	19	0.186275	47	10	0.212766	73	18	0.246575	180	44	0.244444	124	28.8333	0.226205	44	0	0	128	24	0.1875	32	10	0.3125	35	0	0	83	12	0.144578	117	19	0.162393	73.1667	10.8333	0.134495	0.0909832	1.41226
mmu-mir-29a-3p	202769	7333	0.0361643	205547	6056	0.0294628	151562	5217	0.0344216	113757	4719	0.0414832	81422	3029	0.0372012	144412	4669	0.0323311	149912	5170.5	0.0351774	110859	2263	0.0204133	68386	2271	0.0332086	145734	4968	0.0340895	96826	1915	0.0197777	105279	2293	0.0217802	210551	6547	0.0310946	122939	3376.17	0.0267273	0.128205	0.614918
mmu-mir-29b-3p	212778	12302	0.0578161	284764	24886	0.0873917	320214	25879	0.0808178	157149	1992	0.0126759	224426	16653	0.0742026	119697	8953	0.0747972	219838	15110.8	0.0646169	168540	7912	0.0469443	86931	3379	0.0388699	74392	1416	0.0190343	231320	12110	0.0523517	197973	16721	0.084461	58323	2108	0.0361435	136246	7274.33	0.0463008	0.173485	1.0547
mmu-mir-29c-3p	85178	2163	0.0253939	69033	1481	0.0214535	75400	1809	0.023992	64986	1651	0.0254055	74366	1602	0.0215421	71650	1574	0.0219679	73435.5	1713.33	0.0232925	48987	743	0.0151673	30088	488	0.0162191	71359	1485	0.0208103	59760	964	0.0161312	40452	714	0.0176505	126811	2219	0.0174985	62909.5	1102.17	0.0172461	0.0926958	0.636463
mir-3099-3p	385	34	0.0883117	482	35	0.0726141	495	45	0.0909091	344	17	0.0494186	510	60	0.117647	498	40	0.0803213	452.333	38.5	0.0832036	190	0	0	497	0	0	323	14	0.0433437	323	0	0	464	0	0	285	0	0	347	2.33333	0.00722394	0.00366455	4.04439
mmu-mir-30a-3p	1350	18	0.0133333	1510	34	0.0225166	1657	14	0.008449	1896	30	0.0158228	958	14	0.0146138	1245	14	0.011245	1436	20.6667	0.0143301	611	0	0	1383	0	0	3330	42	0.0126126	1487	14	0.00941493	1168	14	0.0119863	1406	22	0.0156472	1564.17	15.3333	0.00827684	0.454108	0.430634
mmu-mir-30a-5p	8598	26	0.00302396	6941	26	0.00374586	8842	28	0.0031667	6904	34	0.00492468	4165	17	0.00408163	2176	19	0.00873162	6271	25	0.00461241	2480	0	0	602	0	0	11092	51	0.00459791	6510	37	0.00568356	4711	24	0.00509446	506	0	0	4316.83	18.6667	0.00256266	0.571793	0.421464
mir-30b-5p	5062	140	0.0276571	12997	185	0.0142341	1589	27	0.0169918	5729	140	0.0244371	4989	121	0.0242534	2616	0	0	5497	102.167	0.0179289	4772	33	0.00691534	437	0	0	3381	0	0	6351	17	0.00267674	4090	29	0.00709046	426	0	0	3242.83	13.1667	0.00278042	0.072448	2.95596
mmu-mir-30c-5p	16612	228	0.013725	41026	292	0.00711744	6229	76	0.012201	4254	14	0.00329102	15994	215	0.0134425	6713	50	0.00744823	15138	145.833	0.00953754	18110	98	0.00541137	1389	0	0	12863	31	0.00241001	17557	54	0.0030757	12401	71	0.00572534	1015	0	0	10555.8	42.3333	0.0027704	0.127538	1.78445
mir-30d-5p	14325	77	0.00537522	9246	61	0.00659745	10399	55	0.00528897	5877	40	0.00680619	7007	51	0.00727844	1853	27	0.014571	8117.83	51.8333	0.00765287	4197	25	0.00595664	780	0	0	8286	50	0.00603427	9122	46	0.00504275	6025	36	0.0059751	596	0	0	4834.33	26.1667	0.00383479	0.0449512	0.98615
mmu-mir-30e-3p	1845	18	0.0097561	2252	32	0.0142096	2444	24	0.00981997	2582	43	0.0166538	1153	12	0.0104076	1911	24	0.0125589	2031.17	25.5	0.0122343	701	10	0.0142653	2052	18	0.00877193	4872	48	0.00985222	1812	20	0.0110375	1530	13	0.00849673	2575	32	0.0124272	2257	23.5	0.0108085	0.687363	0.117836
mmu-mir-30e-5p	9635	58	0.00601972	6045	0	0	9844	55	0.00558716	4231	63	0.0148901	6228	24	0.00385356	1222	10	0.00818331	6200.83	35	0.00642231	3343	24	0.00717918	783	0	0	6528	53	0.00811887	8815	45	0.00510493	7512	28	0.00372737	374	0	0	4559.17	25	0.00402173	0.419245	0.485427
mmu-mir-32-5p	312	67	0.214744	353	69	0.195467	206	34	0.165049	80	11	0.1375	216	63	0.291667	77	0	0	207.333	40.6667	0.167404	167	38	0.227545	104	33	0.317308	229	34	0.148472	197	37	0.187817	124	20	0.16129	93	18	0.193548	152.333	30	0.205997	0.630356	0.438884
mmu-mir-322-5p	697	68	0.097561	477	47	0.0985325	353	26	0.0736544	444	21	0.0472973	395	37	0.0936709	399	28	0.0701754	460.833	37.8333	0.0801486	165	17	0.10303	360	55	0.152778	342	50	0.146199	471	47	0.0997877	468	44	0.0940171	392	39	0.0994898	366.333	42	0.115884	0.52111	-0.150731
mir-326-3p	5782	147	0.0254237	1070	56	0.0523364	1956	107	0.0547035	379	16	0.0422164	2042	50	0.0244858	505	11	0.0217822	1955.67	64.5	0.0368247	528	0	0	927	12	0.012945	359	0	0	885	0	0	2009	36	0.0179194	549	0	0	876.167	8	0.00514406	0.0181009	3.01123
mir-328-3p	22061	235	0.0106523	7358	75	0.010193	9918	119	0.0119984	4116	65	0.015792	10127	101	0.00997334	5516	51	0.00924583	9849.33	107.667	0.0113091	6930	0	0	9163	14	0.00152788	16094	0	0	11530	16	0.00138768	12261	21	0.00171275	5638	0	0	10269.3	8.5	0.000771386	0.00477182	3.66297
mmu-mir-33-5p	1841	126	0.0684411	1395	90	0.0645161	619	26	0.0420032	175	0	0	761	42	0.0551905	142	20	0.140845	822.167	50.6667	0.0618327	3484	264	0.075775	817	90	0.110159	177	12	0.0677966	2046	146	0.0713587	650	77	0.118462	230	0	0	1234	98.1667	0.0739252	0.573831	-0.954196
mmu-mir-330-5p	2437	66	0.0270825	1271	27	0.0212431	2218	10	0.00450857	980	0	0	738	0	0	1776	12	0.00675676	1570	19.1667	0.00993182	978	20	0.0204499	2354	36	0.0152931	1003	0	0	2023	51	0.0252101	2000	33	0.0165	565	0	0	1487.17	23.3333	0.0129088	0.683635	-0.283793
mmu-mir-331-3p	6306	934	0.148113	2542	323	0.127065	158	18	0.113924	643	82	0.127527	3732	495	0.132637	283	28	0.0989399	2277.33	313.333	0.124701	194	25	0.128866	153	24	0.156863	314	22	0.0700637	453	71	0.156733	266	23	0.0864662	1109	205	0.184851	414.833	61.6667	0.13064	0.173485	2.34514
mir-369-3p	18744	92	0.00490824	20090	84	0.00418118	23126	75	0.0032431	11941	62	0.00519219	12166	53	0.0043564	20450	50	0.00244499	17752.8	69.3333	0.00405435	6462	11	0.00170226	10569	16	0.00151386	25666	57	0.00222084	12107	11	0.000908565	9944	16	0.00160901	40110	81	0.00201945	17476.3	32	0.00166233	0.0646101	1.11548
mmu-mir-370-3p	2818	71	0.0251952	629	18	0.0286169	339	0	0	55	0	0	1550	51	0.0329032	120	0	0	918.5	23.3333	0.0144525	466	0	0	804	26	0.0323383	55	0	0	2122	60	0.0282752	535	10	0.0186916	190	0	0	695.333	16	0.0132175	0.86428	0.544321
mir-376a-3p	33833	75	0.00221677	25515	125	0.00489908	41377	62	0.00149842	11919	57	0.00478228	29276	72	0.00245935	30698	54	0.00175907	28769.7	74.1667	0.00293583	17258	27	0.00156449	21456	21	0.000978747	4595	10	0.00217628	23745	13	0.000547484	19049	15	0.000787443	51387	59	0.00114815	22915	24.1667	0.00120043	0.0130652	1.61775
mmu-mir-376b-5p	5311	89	0.0167577	5959	151	0.0253398	2812	70	0.0248933	647	25	0.0386399	3327	38	0.0114217	1385	48	0.034657	3240.17	70.1667	0.0252849	2566	52	0.020265	6149	115	0.0187022	369	0	0	5230	71	0.0135755	3952	82	0.020749	1770	48	0.0271186	3339.33	61.3333	0.0167351	1	0.194114
mmu-mir-378a-3p	517	12	0.0232108	364	10	0.0274725	563	42	0.0746004	435	42	0.0965517	72	0	0	571	15	0.0262697	420.333	20.1667	0.0413509	238	0	0	775	51	0.0658065	434	34	0.078341	768	39	0.0507812	681	35	0.051395	588	28	0.047619	580.667	31.1667	0.0489905	0.520377	-0.628031
mir-382-5p	8153	123	0.0150865	4332	64	0.0147738	2944	64	0.0217391	1216	16	0.0131579	7426	121	0.0162941	4728	89	0.018824	4799.83	79.5	0.0166459	5724	12	0.00209644	5324	14	0.0026296	2578	21	0.00814585	5440	41	0.00753676	4633	36	0.00777034	3995	48	0.012015	4615.67	28.6667	0.006699	0.0303479	1.47158
mir-384-3p	3836	46	0.0119917	4485	77	0.0171683	3816	50	0.0131027	2280	63	0.0276316	2558	34	0.0132916	1840	30	0.0163043	3135.83	50	0.0165817	933	0	0	1014	11	0.0108481	3663	24	0.00655201	4385	27	0.00615735	2433	17	0.00698726	1665	20	0.012012	2348.83	16.5	0.00709279	0.00507487	1.59946
mmu-mir-3962	323	10	0.0309598	824	34	0.0412621	495	10	0.020202	424	14	0.0330189	322	20	0.0621118	286	15	0.0524476	445.667	17.1667	0.0400004	408	12	0.0294118	537	18	0.0335196	300	0	0	323	0	0	469	13	0.0277186	473	0	0	418.333	7.16667	0.0151083	0.12486	1.26024
mmu-mir-433-3p	2942	14	0.00475867	5672	125	0.0220381	9020	54	0.0059867	1232	11	0.00892857	7123	58	0.00814264	3855	38	0.00985733	4974	50	0.009952	4143	21	0.00506879	1792	0	0	4336	28	0.00645756	5066	12	0.00236873	3706	14	0.00377766	2529	0	0	3595.33	12.5	0.00294546	0.0771276	2
mmu-mir-485-3p	1087	34	0.0312787	807	56	0.0693928	530	31	0.0584906	285	15	0.0526316	667	24	0.035982	249	14	0.0562249	604.167	29	0.0506668	413	0	0	284	0	0	1031	34	0.0329777	473	24	0.05074	722	26	0.0360111	294	0	0	536.167	14	0.0199548	0.224839	1.05063
mir-486b-5p	942	52	0.0552017	917	58	0.0632497	779	38	0.0487805	171	0	0	662	16	0.0241692	915	34	0.0371585	731	33	0.0380933	658	0	0	827	0	0	548	12	0.0218978	673	0	0	900	10	0.0111111	1246	14	0.011236	808.667	6	0.00737415	0.0340869	2.45943
mir-487b-3p	2606	32	0.0122794	2635	62	0.0235294	3233	73	0.0225796	1932	39	0.0201863	1676	42	0.0250597	815	12	0.0147239	2149.5	43.3333	0.0197264	1134	0	0	1721	0	0	1086	11	0.0101289	1553	0	0	1523	0	0	618	0	0	1272.5	1.83333	0.00168815	0.00366455	4.56294
mir-497a-5p	3743	413	0.110339	2066	336	0.162633	1808	279	0.154314	2604	298	0.114439	2912	301	0.103365	1147	156	0.136007	2380	297.167	0.130183	1613	102	0.0632362	2275	218	0.0958242	1426	156	0.109397	3277	165	0.0503509	2549	166	0.0651236	710	95	0.133803	1975	150.333	0.0862891	0.0247217	0.983107
mmu-mir-532-3p	963	58	0.0602285	657	35	0.0532725	598	29	0.048495	153	0	0	553	37	0.0669078	106	0	0	505	26.5	0.0381506	209	0	0	480	26	0.0541667	1517	39	0.0257086	689	18	0.0261248	715	22	0.0307692	183	0	0	632.167	17.5	0.0227949	0.463245	0.598637
mir-551b-3p	25724	78	0.00303219	36399	53	0.00145608	14039	93	0.0066244	1442	0	0	23648	40	0.00169147	11891	53	0.00445715	18857.2	52.8333	0.00287688	22663	29	0.00127962	5642	0	0	7828	0	0	18075	43	0.00237898	8490	24	0.00282686	1936	0	0	10772.3	16	0.00108091	0.0500435	1.72338
mmu-mir-652-3p	3977	359	0.090269	2562	367	0.143247	1485	216	0.145455	1977	415	0.209914	1703	124	0.0728127	1294	224	0.173107	2166.33	284.167	0.139134	1440	74	0.0513889	1239	96	0.0774818	1771	307	0.173348	5630	154	0.0273535	3495	118	0.0337625	6125	336	0.0548571	3283.33	180.833	0.0696987	0.0926958	0.652077
mir-667-3p	682	175	0.256598	999	45	0.045045	613	115	0.187602	525	53	0.100952	848	31	0.0365566	315	13	0.0412698	663.667	72	0.111337	723	28	0.0387275	326	0	0	211	0	0	1112	21	0.0188849	365	29	0.0794521	76	0	0	468.833	13	0.0228441	0.0193734	2.46949
mir-676-3p	1573	60	0.0381437	933	36	0.0385852	2212	84	0.0379747	1071	47	0.0438842	1508	70	0.0464191	1794	47	0.0261984	1515.17	57.3333	0.0385342	290	0	0	1339	16	0.0119492	609	0	0	1547	12	0.00775695	1252	15	0.0119808	1763	20	0.0113443	1133.33	10.5	0.00717188	0.00492204	2.44898
mmu-mir-744-5p	2255	177	0.0784922	5067	580	0.114466	3048	414	0.135827	861	127	0.147503	3832	141	0.0367954	1979	164	0.0828701	2840.33	267.167	0.0993256	2768	114	0.041185	2761	137	0.0496197	937	76	0.0811099	4594	142	0.0309099	3699	170	0.0459584	468	23	0.0491453	2537.83	110.333	0.0496547	0.0655522	1.27587
mmu-mir-7a-1-3p	1259	81	0.0643368	1321	81	0.0613172	1575	75	0.047619	318	0	0	824	71	0.086165	741	43	0.0580297	1006.33	58.5	0.0529113	711	43	0.0604782	778	26	0.033419	572	39	0.0681818	951	53	0.0557308	723	41	0.0567082	374	20	0.0534759	684.833	37	0.0546657	0.108074	0.660911
mmu-mir-7a-2-3p	224	29	0.129464	164	16	0.097561	211	18	0.0853081	68	0	0	147	19	0.129252	63	0	0	146.167	13.6667	0.0735975	115	0	0	80	0	0	207	15	0.0724638	209	0	0	157	10	0.0636943	59	0	0	137.833	4.16667	0.022693	0.104415	1.7137
mmu-mir-9-5p	211388	1986	0.00939505	96519	799	0.00827816	281652	1957	0.00694829	127464	956	0.00750016	111415	931	0.00835615	164904	1427	0.00865352	165557	1342.67	0.00818855	73240	422	0.00576188	155447	1150	0.00739802	238142	1779	0.00747033	76854	385	0.0050095	132945	932	0.00701042	255923	1893	0.00739676	155425	1093.5	0.00667448	0.47117	0.296148
mir-92b-3p	3948	140	0.035461	3429	150	0.0437445	5472	205	0.0374635	1207	57	0.0472245	2384	73	0.0306208	2113	51	0.0241363	3092.17	112.667	0.0364418	2685	0	0	2704	13	0.00480769	5298	16	0.00302001	1756	0	0	2316	0	0	2238	0	0	2832.83	4.83333	0.00130462	0.00433691	4.5429
mir-98-5p	2639	259	0.0981432	6064	457	0.0753628	6417	444	0.0691912	5099	296	0.0580506	5200	371	0.0713462	5275	269	0.0509953	5115.67	349.333	0.0705149	3512	120	0.0341686	3623	147	0.0405741	7003	128	0.0182779	3281	142	0.0432795	3480	134	0.0385057	3206	108	0.0336868	4017.5	129.833	0.0347488	0.00507487	1.42794
mmu-mir-99a-5p	15718	811	0.0515969	13772	552	0.0400813	19621	747	0.0380715	12974	291	0.0224295	12810	647	0.0505074	12467	429	0.0344108	14560.3	579.5	0.0395162	9489	342	0.0360417	12163	258	0.0212119	23953	986	0.0411639	13041	482	0.0369604	13465	362	0.0268845	7596	81	0.0106635	13284.5	418.5	0.028821	0.229766	0.469581
mir-99b-5p	2752	91	0.0330669	3044	74	0.0243101	4097	164	0.0400293	1614	59	0.0365551	1642	50	0.0304507	2511	83	0.0330546	2610	86.8333	0.0329111	209	0	0	2942	46	0.0156356	2660	62	0.0233083	3282	70	0.0213285	2894	52	0.0179682	1202	17	0.0141431	2198.17	41.1667	0.0153973	0.0453276	1.07677
