# Supplementary material
Source: HighWire-hosted journal article supplement (doi:10.1101/rna.056937.116)
Supplement: Supplemental_Table2.xlsx [file Supplemental_Table2.xlsx]

## Sheet: merged_additional_U_prop.txt
miRNA	WT6_all	WT6	WT6_prop	WT5_all	WT5	WT5_prop	WT4_all	WT4	WT4_prop	WT3_all	WT3	WT3_prop	WT2_all	WT2	WT2_prop	WT1_all	WT1	WT1_prop	avg_WT_all	WT_avg	KO6_all	KO6	KO6_prop	KO5_all	KO5	KO5_prop	KO4_all	KO4	KO4_prop	KO3_all	KO3	KO3_prop	KO2_all	KO2	KO2_prop	KO1_all	KO1	KO1_prop	avg_KO_all	KO_avg	pval	LOG FC
mmu-let-7e-5p	23777	1995	0.0839046	20154	1430	0.0709537	18856	1211	0.0642236	12166	703	0.057784	17823	1313	0.0736689	27562	2323	0.0842827	20056.3	0.0724696	12292	896	0.0728929	12802	1232	0.096235	19567	1266	0.0647008	11427	747	0.0653715	15388	1197	0.0777879	10459	912	0.0871976	13655.8	0.0773643	0.128205	0.522056
mmu-let-7f-2-3p	394	274	0.695431	347	239	0.688761	500	365	0.73	304	198	0.651316	251	174	0.693227	369	273	0.739837	360.833	0.699762	167	124	0.742515	282	211	0.748227	710	540	0.760563	314	204	0.649682	289	194	0.67128	294	233	0.792517	342.667	0.727464	0.47117	0.0161942
mmu-let-7g-3p	198	107	0.540404	199	124	0.623116	202	113	0.559406	36	21	0.583333	177	106	0.59887	67	27	0.402985	146.5	0.551352	77	36	0.467532	112	63	0.5625	123	55	0.447154	124	69	0.556452	122	70	0.57377	48	20	0.416667	101	0.504013	0.229766	0.669983
mmu-let-7i-3p	157	37	0.235669	341	73	0.214076	110	24	0.218182	19	0	0	286	65	0.227273	93	15	0.16129	167.667	0.176082	125	32	0.256	292	100	0.342466	46	12	0.26087	158	37	0.234177	72	25	0.347222	98	26	0.265306	131.833	0.28434	0.872559	-0.116514
mmu-let-7i-5p	11587	2594	0.223872	57438	12948	0.225426	47341	10685	0.225703	39130	8020	0.204958	47188	13141	0.278482	51217	18911	0.369233	42316.8	0.254612	32474	10002	0.308	32552	11784	0.362005	38518	11501	0.298588	31315	9290	0.296663	31416	8876	0.282531	28911	9236	0.319463	32531	0.311208	0.575174	0.127552
mmu-mir-100-5p	2779	211	0.0759266	3408	250	0.0733568	2818	181	0.06423	2817	220	0.0780973	3142	193	0.0614258	2671	202	0.0756271	2939.17	0.0714439	1809	113	0.0624655	2341	216	0.0922683	7073	615	0.0869504	3360	226	0.0672619	2647	195	0.0736683	2922	218	0.0746064	3358.67	0.0762035	0.688921	-0.332677
mmu-mir-101a-3p	50171	5526	0.110143	45249	4376	0.0967093	22461	2555	0.113753	65153	2828	0.0434055	38678	5405	0.139744	10016	599	0.0598043	38621.3	0.0939265	18340	4215	0.229826	29311	5406	0.184436	6223	416	0.0668488	36816	4067	0.110468	30994	3834	0.123701	13327	450	0.033766	22501.8	0.124841	0.575174	0.211344
mmu-mir-103-3p	18774	962	0.0512411	23998	1175	0.0489624	17634	925	0.0524555	1050	35	0.0333333	15218	857	0.0563149	8675	395	0.0455331	14224.8	0.0479734	13086	562	0.0429467	13614	698	0.0512708	3235	68	0.0210201	22111	987	0.0446384	15545	740	0.0476037	8739	507	0.0580158	12721.7	0.0442492	0.575174	0.287996
mmu-mir-107-3p	39888	159	0.00398616	35654	130	0.00364615	28659	86	0.0030008	1416	0	0	29469	105	0.00356307	13545	44	0.00324843	24771.8	0.00290744	25770	95	0.00368646	27578	118	0.00427877	1988	0	0	28368	97	0.00341935	23165	111	0.00479171	16705	89	0.00532775	20595.7	0.00358401	1	0.0390696
mmu-mir-1191a	95	38	0.4	126	43	0.34127	49	18	0.367347	18	0	0	103	34	0.330097	27	11	0.407407	69.6667	0.307687	55	24	0.436364	42	19	0.452381	42	12	0.285714	50	13	0.26	46	27	0.586957	46	20	0.434783	46.8333	0.409366	0.810181	0.324435
mmu-mir-1193-3p	65	13	0.2	62	22	0.354839	73	24	0.328767	10	0	0	48	20	0.416667	41	15	0.365854	49.8333	0.277688	32	0	0	31	10	0.322581	33	10	0.30303	30	15	0.5	42	14	0.333333	37	18	0.486486	34.1667	0.324238	0.227313	0.4885
mmu-mir-124-3p	167852	732	0.00436098	340742	1820	0.00534128	636464	1273	0.00200011	223010	572	0.00256491	470883	3286	0.00697838	680287	9184	0.0135002	419873	0.00579098	299196	2867	0.00958235	358300	1882	0.00525258	184948	1274	0.00688842	436457	2036	0.00466484	285448	1102	0.0038606	192605	466	0.00241946	292826	0.00544471	0.936186	0.809045
mmu-mir-1249-3p	6222	149	0.0239473	2891	91	0.031477	4483	122	0.0272139	1041	14	0.0134486	4421	92	0.0208098	1284	21	0.0163551	3390.33	0.0222086	2493	55	0.0220618	1659	55	0.0331525	1209	31	0.025641	5010	103	0.0205589	3030	64	0.0211221	1341	56	0.0417599	2457	0.0273827	0.574504	0.425896
mmu-mir-125a-5p	30244	105	0.00347176	27919	45	0.00161181	24345	86	0.00353255	9858	28	0.00284033	14883	100	0.00671908	13816	14	0.00101332	20177.5	0.00319814	14710	68	0.00462271	22801	49	0.00214903	6626	0	0	17364	52	0.0029947	29656	56	0.00188832	12012	47	0.00391275	17194.8	0.00259458	0.688921	0.47478
mmu-mir-125b-2-3p	1194	25	0.020938	1447	17	0.0117484	2472	37	0.0149676	986	0	0	1245	17	0.0136546	1102	20	0.0181488	1407.67	0.0132429	1144	19	0.0166084	1584	26	0.0164141	3867	31	0.00801655	2489	29	0.0116513	1579	42	0.0265991	2036	15	0.00736739	2116.5	0.0144428	0.297107	-0.481869
mmu-mir-126a-3p	14236	1280	0.0899129	9069	1299	0.143235	16699	1509	0.0903647	5392	1098	0.203635	13021	881	0.0676599	19153	1241	0.064794	12928.3	0.109934	5466	208	0.0380534	13013	1126	0.0865289	7514	909	0.120974	17255	1293	0.0749348	15148	1394	0.0920253	15470	1446	0.0934712	12311	0.0843313	0.936186	0.196825
mmu-mir-126a-5p	6863	837	0.121958	8220	868	0.105596	15369	1482	0.0964279	13615	1256	0.0922512	9810	952	0.0970438	13150	1448	0.110114	11171.2	0.103899	6544	634	0.0968826	16084	965	0.0599975	22260	2909	0.130683	14503	1200	0.0827415	13874	1097	0.0790688	25365	2603	0.102622	16438.3	0.0919992	0.688921	-0.459259
mmu-mir-127-3p	7178	422	0.0587907	24606	1426	0.0579533	48647	3170	0.0651633	12903	928	0.0719213	10091	627	0.0621346	16956	1595	0.094067	20063.5	0.0683384	17687	1244	0.0703341	41832	3087	0.0737952	6050	390	0.0644628	48926	2785	0.0569227	36530	2283	0.0624966	42039	4020	0.0956255	32177.3	0.0706062	0.378478	-0.757554
mmu-mir-129-1-3p	1247	18	0.0144346	9442	82	0.0086846	311	0	0	212	0	0	851	11	0.012926	452	0	0	2085.83	0.00600754	542	0	0	776	19	0.0244845	592	0	0	1909	15	0.00785752	790	0	0	672	0	0	880.167	0.00539034	0.655306	1.70695
mmu-mir-130a-3p	4962	474	0.095526	1139	115	0.100966	2224	243	0.109263	311	34	0.109325	2300	252	0.109565	1043	114	0.1093	1996.5	0.105657	1735	142	0.0818444	1796	176	0.0979955	330	62	0.187879	4649	414	0.0890514	1139	101	0.0886743	1036	126	0.121622	1780.83	0.111178	0.810181	0.271019
mmu-mir-130b-3p	136	16	0.117647	110	10	0.0909091	142	0	0	40	0	0	118	15	0.127119	84	11	0.130952	105	0.0777712	50	0	0	75	0	0	32	0	0	224	18	0.0803571	118	10	0.0847458	212	25	0.117925	118.5	0.0471712	1	-0.0274807
mmu-mir-132-3p	3488	627	0.179759	6767	2282	0.337225	2723	474	0.174073	2313	402	0.1738	3744	696	0.185897	4192	594	0.141698	3871.17	0.198742	2490	972	0.390361	2160	836	0.387037	3238	877	0.270846	7774	1639	0.210831	3117	487	0.15624	5554	2841	0.511523	4055.5	0.32114	0.128205	-0.592429
mmu-mir-136-3p	1487	59	0.0396772	1250	43	0.0344	1982	50	0.025227	1007	40	0.0397219	731	32	0.0437756	703	24	0.0341394	1193.33	0.0361569	415	22	0.053012	1452	65	0.0447658	538	10	0.0185874	1455	35	0.024055	1124	25	0.022242	1267	52	0.0410418	1041.83	0.0339507	0.575174	0.246837
mmu-mir-136-5p	103792	28	0.00026977	54131	14	0.000258632	31177	27	0.000866023	26054	10	0.000383818	69914	34	0.000486312	64847	34	0.000524311	58319.2	0.000464811	35648	13	0.000364677	43630	15	0.0003438	197926	93	0.000469873	52958	29	0.000547604	39228	11	0.000280412	39836	19	0.000476956	68204.3	0.000413887	0.809855	-0.292181
mmu-mir-138-1-3p	1393	43	0.0308686	857	26	0.0303384	866	22	0.0254042	518	18	0.034749	750	19	0.0253333	478	10	0.0209205	810.333	0.0279357	668	14	0.0209581	842	26	0.0308789	474	10	0.021097	326	0	0	489	12	0.0245399	283	0	0	513.667	0.0162456	0.0909832	1.15433
mmu-mir-140-5p	714	21	0.0294118	420	23	0.0547619	508	34	0.0669291	37	0	0	538	35	0.0650558	140	0	0	392.833	0.0360264	308	10	0.0324675	287	0	0	67	0	0	689	14	0.0203193	356	0	0	108	0	0	302.5	0.00879781	0.104415	2.23522
mmu-mir-143-3p	6339	2710	0.427512	2361	623	0.263871	4306	1930	0.448212	1033	235	0.227493	4103	1620	0.394833	1972	759	0.384888	3352.33	0.357802	3516	1466	0.416951	1446	452	0.312586	2191	638	0.291191	8542	3403	0.398384	2689	1298	0.482707	913	262	0.286966	3216.17	0.364798	0.810181	0.0671055
mmu-mir-144-3p	403	28	0.0694789	1118	70	0.0626118	858	49	0.0571096	76	0	0	281	16	0.0569395	494	34	0.0688259	538.333	0.0524943	410	22	0.0536585	705	52	0.0737589	126	0	0	1934	102	0.0527404	500	36	0.072	1051	96	0.0913416	787.667	0.0572499	0.422527	-0.644735
mmu-mir-146a-5p	2227	498	0.223619	1798	398	0.221357	1222	248	0.202946	337	29	0.0860534	1338	325	0.2429	615	145	0.235772	1256.17	0.202108	519	178	0.342967	651	262	0.402458	662	194	0.293051	1000	349	0.349	418	144	0.344498	303	134	0.442244	592.167	0.36237	0.47117	0.381764
mmu-mir-148b-3p	205	23	0.112195	304	28	0.0921053	104	12	0.115385	61	0	0	332	37	0.111446	297	22	0.0740741	217.167	0.0842008	90	0	0	110	0	0	608	28	0.0460526	814	131	0.160934	162	19	0.117284	100	18	0.18	314	0.084045	0.746625	-0.683973
mmu-mir-149-5p	2638	118	0.0447309	2243	87	0.0387873	1480	64	0.0432432	439	18	0.0410023	455	13	0.0285714	1157	30	0.0259291	1402	0.037044	2470	86	0.0348178	2074	53	0.0255545	661	27	0.0408472	3243	114	0.0351526	2086	70	0.033557	3262	139	0.0426119	2299.33	0.0354235	0.378478	-0.567368
mmu-mir-150-5p	5044	598	0.118557	4810	715	0.148649	3468	297	0.0856401	2206	202	0.0915684	3085	654	0.211994	1858	191	0.102799	3411.83	0.126534	2286	439	0.192038	2767	535	0.19335	1890	161	0.0851852	3406	498	0.146213	3266	479	0.146663	2007	242	0.120578	2603.67	0.147338	0.575174	0.174684
mmu-mir-151-3p	554	30	0.0541516	700	50	0.0714286	646	35	0.0541796	379	26	0.0686016	252	13	0.0515873	644	42	0.0652174	529.167	0.060861	104	0	0	719	61	0.0848401	554	43	0.0776173	423	25	0.0591017	763	59	0.0773263	618	25	0.0404531	530.167	0.0565564	0.936075	-0.12
mmu-mir-152-3p	469	73	0.15565	368	133	0.361413	1120	189	0.16875	304	17	0.0559211	478	77	0.161088	920	51	0.0554348	609.833	0.15971	658	117	0.177812	312	23	0.0737179	657	34	0.0517504	907	122	0.134509	476	72	0.151261	421	12	0.0285036	571.833	0.102926	0.378478	0.50696
mmu-mir-153-5p	6828	202	0.0295841	4582	109	0.0237887	7699	195	0.025328	4375	54	0.0123429	6521	188	0.0288299	1345	15	0.0111524	5225	0.0218377	4940	165	0.0334008	2887	45	0.0155871	177	0	0	4000	86	0.0215	6233	204	0.032729	388	0	0	3104.17	0.0172028	0.377642	0.609755
mmu-mir-154-5p	2933	29	0.00988749	4362	62	0.0142137	3694	126	0.0341094	718	63	0.0877437	3691	55	0.0149011	4087	45	0.0110105	3247.5	0.0286443	7639	51	0.00667627	3340	74	0.0221557	1078	12	0.0111317	4109	49	0.011925	2825	52	0.0184071	5173	69	0.0133385	4027.33	0.013939	0.810181	0.307761
mmu-mir-15a-5p	5828	24	0.00411805	3517	14	0.00398067	3720	0	0	5234	47	0.00897975	3541	36	0.0101666	1250	11	0.0088	3848.33	0.00600751	1945	0	0	1428	12	0.00840336	3587	28	0.00780597	4724	61	0.0129128	3607	10	0.00277239	909	19	0.0209021	2700	0.00879943	0.872559	0.0220263
mmu-mir-181a-1-3p	1456	28	0.0192308	903	16	0.0177187	1402	34	0.0242511	266	0	0	920	22	0.023913	765	15	0.0196078	952	0.0174536	720	13	0.0180556	1466	33	0.0225102	277	0	0	1528	26	0.0170157	1171	29	0.0247652	2385	54	0.0226415	1257.83	0.017498	0.630356	-0.430634
mmu-mir-181c-3p	569	18	0.0316344	411	11	0.026764	666	20	0.03003	91	0	0	428	20	0.046729	386	0	0	425.167	0.0225262	356	12	0.0337079	544	24	0.0441176	117	0	0	609	29	0.047619	446	14	0.0313901	840	11	0.0130952	485.333	0.0283217	0.627319	-0.383329
mmu-mir-1843b-5p	131	14	0.10687	702	41	0.0584046	1075	63	0.0586047	315	0	0	391	17	0.0434783	523	25	0.0478011	522.833	0.0525265	427	26	0.0608899	338	24	0.0710059	334	0	0	729	47	0.0644719	620	53	0.0854839	362	23	0.0635359	468.333	0.0575646	0.748349	-0.1127
mmu-mir-186-3p	1057	34	0.0321665	542	0	0	1030	25	0.0242718	930	11	0.011828	722	0	0	609	0	0	815	0.0113777	410	13	0.0317073	382	0	0	141	0	0	885	10	0.0112994	669	15	0.0224215	868	13	0.014977	559.167	0.0134009	1	0.456858
mmu-mir-1957a	515	124	0.240777	771	108	0.140078	563	191	0.339254	359	105	0.292479	304	55	0.180921	389	62	0.159383	483.5	0.225482	1551	52	0.0335268	2585	244	0.0943907	283	27	0.0954064	1111	235	0.211521	972	222	0.228395	647	117	0.180835	1191.5	0.140679	0.575174	-0.475809
mmu-mir-195a-5p	5656	14	0.00247525	5004	10	0.0019984	4459	0	0	4536	22	0.00485009	2952	0	0	3710	11	0.00296496	4386.17	0.00204812	1748	0	0	1540	0	0	6587	25	0.00379535	3658	14	0.00382723	3805	18	0.00473062	3795	0	0	3522.17	0.00205887	1	0
mmu-mir-199b-3p	392	28	0.0714286	264	0	0	230	15	0.0652174	258	10	0.0387597	303	22	0.0726073	527	38	0.0721063	329	0.0533532	233	0	0	469	19	0.0405117	31	0	0	570	34	0.0596491	386	19	0.0492228	615	21	0.0341463	384	0.0305883	0.686311	0.28102
mmu-mir-203-3p	153	16	0.104575	174	19	0.109195	75	10	0.133333	67	13	0.19403	121	0	0	117	0	0	117.833	0.090189	19	0	0	110	10	0.0909091	128	16	0.125	125	14	0.112	123	15	0.121951	19	0	0	87.3333	0.0749767	0.934807	0.0766213
mmu-mir-204-5p	20587	422	0.0204984	11620	223	0.019191	11752	217	0.0184649	4553	82	0.0180101	11602	232	0.0199966	3462	58	0.0167533	10596	0.0188191	31279	592	0.0189264	7102	83	0.0116868	17192	320	0.0186133	7835	135	0.0172304	8567	164	0.0191432	1609	23	0.0142946	12264	0.0166491	0.936186	-0.093913
mmu-mir-212-3p	2818	467	0.16572	3701	514	0.138881	2586	413	0.159706	2072	290	0.139961	1827	318	0.174056	3631	633	0.174332	2772.5	0.158776	1770	287	0.162147	946	180	0.190275	1800	332	0.184444	3269	476	0.14561	3034	363	0.119644	1989	278	0.139769	2134.67	0.156982	0.128205	0.459705
mmu-mir-218-2-3p	363	18	0.0495868	353	69	0.195467	216	32	0.148148	55	0	0	242	38	0.157025	201	21	0.104478	238.333	0.109117	310	47	0.151613	402	39	0.0970149	54	0	0	346	24	0.0693642	318	17	0.0534591	123	13	0.105691	258.833	0.0795237	0.748349	0.34645
mmu-mir-218-5p	40850	91	0.00222766	13810	63	0.00456191	49770	157	0.00315451	22964	19	0.000827382	32555	107	0.00328675	37843	66	0.00174405	32965.3	0.00263371	18985	53	0.00279168	20044	35	0.00174616	25959	21	0.000808968	16280	71	0.00436118	34768	108	0.0031063	42836	122	0.00284807	26478.7	0.00261039	0.810181	0.294934
mmu-mir-219a-2-3p	2979	90	0.0302115	4018	147	0.0365854	1281	28	0.0218579	416	0	0	3138	111	0.0353728	1435	28	0.0195122	2211.17	0.0239233	3469	110	0.0317094	2850	118	0.0414035	2927	89	0.0304066	5779	240	0.0415297	3408	114	0.0334507	4632	250	0.0539724	3844.17	0.0387454	0.0921251	-1.18885
mmu-mir-221-3p	106436	3590	0.0337292	95740	3822	0.0399206	133151	4983	0.0374237	10971	272	0.0247926	68694	2092	0.0304539	87528	3333	0.0380792	83753.3	0.0340665	83649	2993	0.0357805	58759	2361	0.0401811	119939	3430	0.0285979	40081	2012	0.0501983	56582	2108	0.0372557	28340	1288	0.0454481	64558.3	0.0395769	0.297953	0.350274
mmu-mir-222-3p	76769	129	0.00168037	39726	100	0.00251724	7220	62	0.00858726	1591	0	0	6368	42	0.00659548	9353	57	0.0060943	23504.5	0.00424577	24036	163	0.00678149	4986	37	0.00742078	9824	19	0.00193404	66077	317	0.00479743	20285	165	0.00813409	13483	96	0.00712008	23115.2	0.00603132	0.378478	-1.03111
mmu-mir-223-3p	513	113	0.220273	420	88	0.209524	262	48	0.183206	649	110	0.169492	270	43	0.159259	22	0	0	356	0.156959	195	39	0.2	102	23	0.22549	169	40	0.236686	378	83	0.219577	255	56	0.219608	45	0	0	190.667	0.18356	0.199397	0.738162
mmu-mir-23a-3p	18805	57	0.00303111	17397	53	0.0030465	16529	36	0.00217799	11051	49	0.00443399	13722	45	0.00327941	12707	17	0.00133785	15035.2	0.00288447	7934	19	0.00239476	9073	22	0.00242478	8938	14	0.00156635	13999	48	0.00342882	11157	35	0.00313704	21622	24	0.00110998	12120.5	0.00234362	0.0926958	0.665775
mmu-mir-23b-3p	24356	39	0.00160125	18800	27	0.00143617	17843	21	0.00117693	9704	17	0.00175185	16461	23	0.00139724	14253	22	0.00154353	16902.8	0.0014845	8963	14	0.00156198	9900	0	0	8453	0	0	15564	22	0.00141352	10920	25	0.00228938	15423	10	0.000648382	11537.2	0.000985542	0.0771276	1.06942
mmu-mir-24-3p	22489	9557	0.424963	13365	3553	0.265844	9743	2209	0.226727	20645	6309	0.305595	16989	7436	0.437695	27934	8950	0.320398	18527.5	0.330204	12914	3088	0.23912	12088	2111	0.174636	45296	12690	0.280157	39456	12037	0.305074	29978	11003	0.367036	2802	898	0.320485	23755.7	0.281085	0.936186	-0.137904
mmu-mir-26a-5p	46435	2440	0.0525466	53718	2388	0.0444544	63715	2271	0.0356431	39708	1746	0.043971	29466	1375	0.046664	33689	1198	0.0355606	44455.2	0.0431399	23448	1060	0.0452064	40227	1823	0.0453178	41942	1283	0.0305899	28698	1242	0.0432783	40250	1879	0.0466832	24931	751	0.0301231	33249.3	0.0401998	0.128205	0.506401
mmu-mir-27a-3p	2934	143	0.0487389	1432	78	0.0544693	960	27	0.028125	1344	81	0.0602679	857	26	0.0303384	428	20	0.046729	1325.83	0.0447781	728	31	0.0425824	441	27	0.0612245	356	17	0.0477528	1599	82	0.0512821	1182	62	0.0524535	517	39	0.0754352	803.833	0.0551217	0.872559	0.53952
mmu-mir-27b-3p	7091	314	0.0442815	5223	158	0.0302508	4585	87	0.0189749	4152	182	0.0438343	3053	83	0.0271864	1646	26	0.0157959	4291.67	0.030054	2468	84	0.0340357	1770	39	0.0220339	1129	24	0.0212578	5006	223	0.0445465	4836	166	0.0343259	1871	76	0.04062	2846.67	0.0328033	0.47117	0.473931
mmu-mir-28a-3p	144	28	0.194444	198	31	0.156566	102	16	0.156863	47	14	0.297872	73	13	0.178082	180	32	0.177778	124	0.193601	44	12	0.272727	128	21	0.164062	32	0	0	35	0	0	83	14	0.168675	117	35	0.299145	73.1667	0.150768	0.260658	0.708537
mmu-mir-29c-5p	2024	18	0.00889328	1611	19	0.0117939	3777	31	0.00820757	797	0	0	3297	35	0.0106157	976	0	0	2080.33	0.00658508	1734	20	0.011534	1181	25	0.0211685	827	0	0	1997	19	0.00951427	1122	0	0	258	0	0	1186.5	0.00703613	0.61774	0.686501
mmu-mir-300-3p	1467	118	0.0804363	1080	29	0.0268519	882	25	0.0283447	212	0	0	724	21	0.0290055	438	17	0.0388128	800.5	0.0339085	555	33	0.0594595	684	30	0.0438596	261	0	0	918	53	0.0577342	1332	62	0.0465465	343	17	0.0495627	682.167	0.0428604	0.573831	0.106915
mmu-mir-3085-3p	215	81	0.376744	284	106	0.373239	163	50	0.306748	19	0	0	108	40	0.37037	114	41	0.359649	150.5	0.297792	210	112	0.533333	252	115	0.456349	27	16	0.592593	175	94	0.537143	114	58	0.508772	56	25	0.446429	139	0.512436	0.47117	-0.401363
mmu-mir-30a-5p	8598	52	0.00604792	6941	38	0.00547472	8842	44	0.00497625	6904	46	0.0066628	4165	10	0.00240096	2176	12	0.00551471	6271	0.00517956	2480	0	0	602	0	0	11092	54	0.00486837	6510	28	0.00430108	4711	23	0.00488219	506	0	0	4316.83	0.00234194	0.226491	0.943966
mmu-mir-30b-5p	5062	80	0.015804	12997	300	0.0230822	1589	24	0.0151038	5729	354	0.0617909	4989	135	0.0270595	2616	48	0.0183486	5497	0.0268649	4772	92	0.0192791	437	0	0	3381	77	0.0227743	6351	112	0.017635	4090	60	0.0146699	426	0	0	3242.83	0.0123931	0.228951	1.46442
mmu-mir-30d-5p	14325	157	0.0109599	9246	161	0.0174129	10399	122	0.0117319	5877	99	0.0168453	7007	97	0.0138433	1853	18	0.00971398	8117.83	0.0134179	4197	49	0.011675	780	0	0	8286	94	0.0113444	9122	118	0.0129358	6025	66	0.0109544	596	0	0	4834.33	0.00781826	0.065081	1
mmu-mir-30e-5p	9635	35	0.00363259	6045	10	0.00165426	9844	29	0.00294596	4231	16	0.00378161	6228	31	0.00497752	1222	0	0	6200.83	0.00283199	3343	0	0	783	0	0	6528	19	0.00291054	8815	32	0.00363018	7512	33	0.00439297	374	0	0	4559.17	0.00182228	0.624835	0.526546
mmu-mir-320-3p	3673	526	0.143207	4435	478	0.107779	4360	369	0.084633	3092	349	0.112872	4454	563	0.126403	4828	478	0.0990058	4140.33	0.112317	2905	383	0.131842	3963	461	0.116326	2680	238	0.088806	5503	871	0.158277	3376	426	0.126185	5964	501	0.084004	4065.17	0.117573	0.809855	-0.0598332
mmu-mir-322-5p	697	12	0.0172166	477	12	0.0251572	353	0	0	444	10	0.0225225	395	0	0	399	0	0	460.833	0.0108161	165	0	0	360	11	0.0305556	342	0	0	471	20	0.0424628	468	13	0.0277778	392	0	0	366.333	0.0167994	0.731945	-0.371969
mmu-mir-324-5p	4252	109	0.025635	2067	55	0.0266086	4596	164	0.0356832	358	0	0	2408	95	0.0394518	1531	24	0.015676	2535.33	0.0238424	745	10	0.0134228	1827	32	0.0175151	1280	32	0.025	2743	72	0.0262486	2661	81	0.0304397	768	14	0.0182292	1670.67	0.0218092	0.377642	0.891242
mmu-mir-326-3p	5782	477	0.0824974	1070	109	0.101869	1956	119	0.0608384	379	24	0.0633245	2042	107	0.0523996	505	37	0.0732673	1955.67	0.0723661	528	42	0.0795455	927	81	0.0873786	359	25	0.0696379	885	99	0.111864	2009	158	0.0786461	549	58	0.105647	876.167	0.0887865	0.575174	0.914969
mmu-mir-328-3p	22061	2200	0.0997235	7358	484	0.0657787	9918	774	0.0780399	4116	511	0.12415	10127	814	0.0803792	5516	498	0.0902828	9849.33	0.0897256	6930	700	0.10101	9163	840	0.091673	16094	812	0.0504536	11530	910	0.0789245	12261	1257	0.10252	5638	664	0.117772	10269.3	0.0903923	0.297953	0.0270237
mmu-mir-331-3p	6306	1398	0.221694	2542	644	0.253344	158	21	0.132911	643	75	0.116641	3732	812	0.217578	283	43	0.151943	2277.33	0.182352	194	34	0.175258	153	30	0.196078	314	57	0.181529	453	114	0.251656	266	32	0.120301	1109	311	0.280433	414.833	0.200876	0.297953	2.37245
mmu-mir-337-3p	2293	29	0.0126472	1920	26	0.0135417	1463	16	0.0109364	95	0	0	1745	28	0.0160458	891	0	0	1401.17	0.00886186	1228	19	0.0154723	1886	30	0.0159067	671	0	0	1715	35	0.0204082	1002	17	0.0169661	1446	24	0.0165975	1324.67	0.0142251	0.572476	-0.336428
mmu-mir-337-5p	1132	25	0.0220848	1463	27	0.0184552	1553	11	0.00708307	599	0	0	711	0	0	915	12	0.0131148	1062.17	0.010123	157	0	0	804	12	0.0149254	930	0	0	1658	30	0.0180941	1575	28	0.0177778	637	0	0	960.167	0.00846621	1	0.0995357
mmu-mir-338-3p	40757	2600	0.0637927	51354	2371	0.0461697	30648	1923	0.0627447	70075	2742	0.0391295	40168	1690	0.0420733	42497	1691	0.039791	45916.5	0.0489502	32884	1148	0.0349106	21043	738	0.035071	37817	234	0.00618769	60973	2594	0.0425434	45110	2015	0.0446686	61566	295	0.00479161	43232.2	0.0280288	0.0926958	0.890032
mmu-mir-339-3p	177	22	0.124294	106	18	0.169811	100	24	0.24	17	0	0	82	13	0.158537	129	27	0.209302	101.833	0.150324	115	16	0.13913	26	0	0	54	20	0.37037	163	37	0.226994	106	33	0.311321	16	0	0	80	0.174636	1	-0.0274807
mmu-mir-341-3p	138	17	0.123188	321	113	0.352025	281	107	0.380783	56	0	0	166	37	0.222892	99	27	0.272727	176.833	0.225269	145	23	0.158621	64	16	0.25	150	54	0.36	98	42	0.428571	92	29	0.315217	51	12	0.235294	100	0.291284	0.688921	0.774188
mmu-mir-342-3p	2209	24	0.0108646	3287	25	0.00760572	3976	26	0.00653924	1708	16	0.00936768	1683	11	0.00653595	3131	31	0.00990099	2665.67	0.00846904	1957	10	0.00510986	2690	31	0.0115242	1818	22	0.0121012	3072	16	0.00520833	2690	23	0.00855019	1262	14	0.0110935	2248.17	0.00893121	0.376804	0.197301
mmu-mir-346-5p	868	49	0.0564516	538	21	0.0390335	395	23	0.0582278	70	0	0	653	43	0.0658499	315	19	0.0603175	473.167	0.0466467	435	38	0.0873563	207	11	0.0531401	126	0	0	394	34	0.0862944	366	24	0.0655738	14	0	0	257	0.0487274	0.572476	0.534657
mmu-mir-34b-5p	644	11	0.0170807	1478	0	0	781	0	0	780	0	0	2128	27	0.012688	418	0	0	1038.17	0.00496145	5875	52	0.00885106	959	12	0.012513	508	0	0	1081	0	0	592	0	0	718	17	0.0236769	1622.17	0.00750683	0.531995	-1.09192
mmu-mir-378a-3p	517	20	0.0386847	364	0	0	563	13	0.0230906	435	0	0	72	0	0	571	20	0.0350263	420.333	0.0161336	238	0	0	775	14	0.0180645	434	12	0.0276498	768	10	0.0130208	681	21	0.030837	588	11	0.0187075	580.667	0.0180466	0.743971	-0.359542
mmu-mir-379-5p	3310	39	0.0117825	2799	45	0.0160772	2912	64	0.021978	1626	20	0.0123001	3181	11	0.00345803	2019	36	0.0178306	2641.17	0.0139044	1657	23	0.0138805	1226	22	0.0179445	4540	32	0.00704846	4668	88	0.0188518	3998	47	0.0117559	583	0	0	2778.67	0.0115802	0.936186	0.0202724
mmu-mir-382-5p	8153	300	0.0367963	4332	190	0.0438596	2944	225	0.0764266	1216	34	0.0279605	7426	214	0.0288177	4728	148	0.0313029	4799.83	0.0408606	5724	193	0.0337177	5324	205	0.0385049	2578	76	0.0294802	5440	189	0.0347426	4633	150	0.0323764	3995	261	0.0653317	4615.67	0.0390256	0.810181	0.0488648
mmu-mir-423-3p	468	24	0.0512821	556	22	0.0395683	353	13	0.0368272	121	0	0	363	15	0.0413223	350	19	0.0542857	368.5	0.0372143	383	10	0.0261097	186	16	0.0860215	58	0	0	528	27	0.0511364	426	17	0.0399061	144	0	0	287.5	0.0338623	0.572476	0.409876
mmu-mir-434-3p	10530	73	0.00693257	5570	45	0.00807899	9492	48	0.00505689	2553	12	0.00470035	5606	24	0.00428113	3043	24	0.00788695	6132.33	0.00615615	5154	18	0.00349243	3571	31	0.00868104	9849	89	0.00903645	7731	30	0.00388048	6950	48	0.00690647	2378	15	0.00630782	5938.83	0.00638412	1	-0.0315701
mmu-mir-484	2884	230	0.0797503	3279	195	0.0594694	4823	249	0.0516276	3234	107	0.033086	2717	178	0.0655134	1943	90	0.0463201	3146.67	0.0559611	3375	243	0.072	2374	157	0.0661331	4239	139	0.0327908	3606	269	0.0745979	3561	217	0.0609379	3033	285	0.0939664	3364.67	0.0667377	0.297953	-0.320552
mmu-mir-485-5p	869	20	0.023015	1048	34	0.0324427	1042	25	0.0239923	222	0	0	820	40	0.0487805	722	15	0.0207756	787.167	0.0248344	641	18	0.0280811	1074	29	0.0270019	431	0	0	1007	33	0.0327706	551	12	0.0217786	521	20	0.0383877	704.167	0.02467	0.573831	0.258734
mmu-mir-486b-5p	942	210	0.22293	917	186	0.202835	779	176	0.225931	171	55	0.321637	662	147	0.222054	915	247	0.269945	731	0.244222	658	166	0.25228	827	249	0.301088	548	118	0.215328	673	100	0.148588	900	176	0.195556	1246	289	0.231942	808.667	0.22413	1	-0.104895
mmu-mir-488-3p	167	45	0.269461	217	58	0.267281	229	64	0.279476	106	30	0.283019	64	24	0.375	145	20	0.137931	154.667	0.268695	80	28	0.35	126	40	0.31746	130	29	0.223077	138	47	0.34058	221	56	0.253394	128	47	0.367188	137.167	0.308616	0.936075	-0.0354779
mmu-mir-496a-3p	2797	112	0.0400429	1220	88	0.0721311	722	61	0.0844875	182	11	0.0604396	2144	87	0.0405784	851	46	0.0540541	1319.33	0.0586223	1297	50	0.0385505	400	21	0.0525	1111	92	0.0828083	1753	77	0.0439247	380	36	0.0947368	1420	75	0.0528169	1060.17	0.0608895	0.688921	0.206451
mmu-mir-497a-5p	3743	182	0.0486241	2066	182	0.0880929	1808	69	0.0381637	2604	94	0.0360983	2912	123	0.042239	1147	124	0.108108	2380	0.060221	1613	47	0.0291383	2275	178	0.0782418	1426	84	0.058906	3277	89	0.027159	2549	109	0.0427619	710	78	0.109859	1975	0.0576777	0.172733	0.403897
mmu-mir-500-3p	1234	177	0.143436	615	31	0.0504065	380	0	0	81	0	0	922	135	0.146421	257	0	0	581.5	0.0567106	419	17	0.0405728	412	0	0	120	0	0	789	92	0.116603	403	10	0.0248139	291	10	0.0343643	405.667	0.036059	0.802952	1.41084
mmu-mir-501-3p	232	36	0.155172	204	23	0.112745	193	15	0.0777202	81	0	0	209	26	0.124402	214	17	0.0794393	188.833	0.0915798	116	15	0.12931	185	14	0.0756757	135	0	0	233	21	0.0901288	133	13	0.0977444	272	15	0.0551471	179	0.0746677	0.145969	0.584963
mmu-mir-532-3p	963	62	0.0643821	657	56	0.0852359	598	48	0.0802676	153	11	0.0718954	553	40	0.0723327	106	0	0	505	0.0623523	209	20	0.0956938	480	16	0.0333333	1517	46	0.030323	689	65	0.0943396	715	53	0.0741259	183	24	0.131148	632.167	0.0764939	0.936186	-0.0458037
mmu-mir-652-3p	3977	2655	0.667589	2562	1553	0.606167	1485	911	0.613468	1977	1254	0.634294	1703	1120	0.657663	1294	745	0.575734	2166.33	0.625819	1440	1023	0.710417	1239	774	0.624697	1771	998	0.563523	5630	4289	0.761812	3495	2591	0.741345	6125	4537	0.740735	3283.33	0.690421	0.575174	-0.786744
mmu-mir-664-3p	964	57	0.0591286	631	50	0.0792393	224	27	0.120536	163	20	0.122699	527	40	0.0759013	353	44	0.124646	477	0.097025	299	19	0.0635452	186	15	0.0806452	320	29	0.090625	363	43	0.118457	280	31	0.110714	425	63	0.148235	312.167	0.102037	0.47117	0.250962
mmu-mir-667-3p	682	28	0.0410557	999	78	0.0780781	613	38	0.0619902	525	40	0.0761905	848	83	0.0978774	315	21	0.0666667	663.667	0.0703098	723	43	0.0594744	326	19	0.0582822	211	15	0.07109	1112	85	0.0764388	365	30	0.0821918	76	0	0	468.833	0.0579129	0.378478	0.584963
mmu-mir-671-5p	451	35	0.0776053	310	14	0.0451613	268	0	0	50	0	0	270	0	0	465	13	0.027957	302.333	0.0251206	510	56	0.109804	540	67	0.124074	151	19	0.125828	656	92	0.140244	451	40	0.0886918	296	50	0.168919	434	0.12626	0.00779583	-2.38565
mmu-mir-674-5p	3352	1205	0.359487	4641	1533	0.330317	6259	2352	0.375779	1409	472	0.334989	2141	698	0.326016	2186	657	0.300549	3331.33	0.337856	2597	1244	0.479014	4200	1847	0.439762	812	306	0.376847	3035	1263	0.416145	3488	1257	0.360378	2363	983	0.415997	2749.17	0.414691	0.810181	0.00355009
mmu-mir-676-3p	1573	91	0.0578512	933	41	0.0439443	2212	93	0.0420434	1071	66	0.0616246	1508	47	0.0311671	1794	68	0.0379041	1515.17	0.0457558	290	12	0.0413793	1339	61	0.0455564	609	13	0.0213465	1547	81	0.0523594	1252	63	0.0503195	1763	75	0.0425411	1133.33	0.0422504	0.378478	0.41267
mmu-mir-708-3p	738	49	0.0663957	662	31	0.0468278	685	10	0.0145985	280	15	0.0535714	473	32	0.0676533	470	0	0	551.333	0.0415078	205	10	0.0487805	763	57	0.0747051	192	0	0	528	35	0.0662879	581	45	0.0774527	768	0	0	506.167	0.0445377	1	-0.10164
mmu-mir-744-5p	2255	182	0.0807095	5067	404	0.0797316	3048	228	0.0748031	861	127	0.147503	3832	323	0.0842902	1979	179	0.0904497	2840.33	0.0929145	2768	222	0.0802023	2761	248	0.0898225	937	111	0.118463	4594	290	0.0631258	3699	272	0.0735334	468	42	0.0897436	2537.83	0.0858151	0.688921	0.284184
mmu-mir-873a-5p	2632	274	0.104103	3924	511	0.130224	974	102	0.104723	214	15	0.0700935	3122	322	0.103139	405	23	0.0567901	1878.5	0.0948455	1984	205	0.103327	1373	84	0.0611799	183	0	0	2607	173	0.0663598	1775	302	0.170141	507	25	0.0493097	1404.83	0.0750528	0.575174	0.660364
mmu-mir-874-3p	948	71	0.0748945	1168	71	0.0607877	1413	129	0.0912951	271	64	0.236162	265	12	0.045283	1020	131	0.128431	847.5	0.106142	357	24	0.0672269	594	57	0.0959596	544	113	0.207721	1125	55	0.0488889	979	70	0.0715015	260	19	0.0730769	643.167	0.0940624	0.228951	0.499987
mmu-mir-877-3p	287	56	0.195122	206	39	0.18932	103	26	0.252427	37	11	0.297297	214	51	0.238318	51	16	0.313725	149.667	0.247702	195	43	0.220513	49	16	0.326531	79	11	0.139241	273	57	0.208791	154	34	0.220779	16	0	0	127.667	0.185976	0.687885	0.305708
mmu-mir-9-3p	6972	68	0.0097533	8159	99	0.0121338	3804	17	0.00446898	6799	82	0.0120606	7017	59	0.00840815	8176	68	0.00831703	6821.17	0.00919032	2957	22	0.00743997	3850	47	0.0122078	7728	65	0.00841097	1440	18	0.0125	3923	52	0.0132552	13949	83	0.00595025	5641.17	0.00996069	0.297107	0.453479
mmu-mir-9-5p	211388	1324	0.00626336	96519	512	0.00530466	281652	1403	0.00498132	127464	709	0.00556235	111415	599	0.0053763	164904	832	0.00504536	165557	0.00542223	73240	310	0.00423266	155447	773	0.00497276	238142	1332	0.0055933	76854	335	0.00435891	132945	678	0.00509985	255923	1353	0.00528675	155425	0.00492404	0.688921	0.170026
mmu-mir-92b-3p	3948	282	0.0714286	3429	208	0.0606591	5472	327	0.0597588	1207	57	0.0472245	2384	160	0.0671141	2113	142	0.067203	3092.17	0.0622313	2685	222	0.0826816	2704	191	0.0706361	5298	348	0.0656852	1756	149	0.0848519	2316	158	0.0682211	2238	128	0.0571939	2832.83	0.071545	1	-0.0243293
mmu-mir-98-5p	2639	57	0.0215991	6064	225	0.0371042	6417	199	0.0310114	5099	117	0.0229457	5200	180	0.0346154	5275	260	0.0492891	5115.67	0.0327608	3512	124	0.0353075	3623	189	0.0521667	7003	266	0.0379837	3281	91	0.0277354	3480	119	0.0341954	3206	112	0.0349345	4017.5	0.0370539	0.688921	0.204207
mmu-mir-99a-5p	15718	3760	0.239216	13772	2591	0.188135	19621	3420	0.174303	12974	1509	0.11631	12810	2584	0.201717	12467	1929	0.154728	14560.3	0.179068	9489	1662	0.17515	12163	1666	0.136973	23953	3064	0.127917	13041	1993	0.152826	13465	2113	0.156925	7596	1221	0.160742	13284.5	0.151756	0.229766	0.430436
mmu-mir-99b-5p	2752	132	0.0479651	3044	166	0.0545335	4097	149	0.0363681	1614	84	0.0520446	1642	75	0.045676	2511	110	0.0438072	2610	0.0467324	209	12	0.0574163	2942	107	0.0363698	2660	52	0.0195489	3282	116	0.0353443	2894	131	0.0452661	1202	51	0.0424293	2198.17	0.0393958	0.128205	0.610372
